# Supplementary material
Source: PubMed Central journal article supplement (PMC2685678)

## Supplementary Materials:

**Supplemental Fig. 1. Stoichiometry of Cd(II) and Zn(II) binding to wild type and mutant CadCs.** (A) Zn(II) (circles) and Cd(II) (triangles) titration of wild type CadC. The open and closed figures represent the results from four independent assays. The x-axis indicates the added concentration of either Cd(II) or Zn(II). The data that the dimer can either bind a 4 Zn(II) or 2 Cd(II). (B) Comparison of Cd(II) (open bars) and Zn(II) (closed bars) binding stoichiometry between wild type, Site 1 and site 2 mutants. Each protein binds 2 Cd(II) per dimer. The Site 1 and Site 2 mutants bind 2 Zn(II) per dimer, compared with 4 for the wild type.

**Supplemental Fig. 2. CadC Zn EXAFS, Fourier transforms of the EXAFS and fitting analysis.** Unfiltered EXAFS with respective Fourier transforms are: (A, F) wild type CadC with 1 Zn bound, (B, G) wild type CadC with 2 Zn bound, (C, H) wild type CadC with 1 Zn and 1 Cd bound, (D, I) Site 1 mutant with 1 Zn bound and (E, J) Site 2 mutant with 1 Zn bound. Empirical data are shown as solid lines while simulations are given in dashed lines.

**Supplemental Fig. 3. CadC Cd EXAFS, Fourier transforms of the EXAFS and fitting analysis.** Unfiltered EXAFS data figures include: (A) wild type CadC with 1 Cd bound, (B) wild type CadC with 2 Cd bound, (C) wild type CadC with 1 Zn and 1 Cd bound, (D) Site 1 mutant with 1 Cd bound and (E) Site 2 mutant with 1 Cd bound. Fourier transforms of the respective EXAFS spectra are adjacent to the EXAFS figure. Empirical data are shown as solid lines while simulations are given in dashed lines.

**Supplemental Fig. 4. Multiple alignment of CadC, SmtB and ArsR.** The sequence of plasmid pI258 CadC (P20047), *Synechocystis* sp. PCC 7942 SmtB (P30340) and plasmid R773 ArsR (P15905) were aligned with CLUSTAL W. The cysteine residues of Site 1 and the four residues of Site 2 are indicated, as is Gly<sup>84</sup> of CadC, Gly<sup>68</sup> of ArsR and Arg<sup>87</sup> of SmtB. Accession numbers are given in parentheses.

**Supplemental Table 1. X-ray data and structure refinement statistics.** X-ray data and structure refinement statistics of the CadC Site 2 mutant. For comparison, statistics for wild type CadC are also given.

| Parameter                               | Site 2 mutant                | Wild type         |
|-----------------------------------------|------------------------------|-------------------|
| <b>Data</b>                             |                              |                   |
| Space group                             | P4 <sub>3</sub>              | P4 <sub>1</sub>   |
| Cell dimensions                         | a=b=89.5, c=148.5            | a=b=116.5, c=41.8 |
| Beamline                                | 21-ID-D (APS)                | 14-BM-C (APS)     |
| Wave length (Å)                         | 0.9787                       | 0.9               |
| Resolution (Å)*                         | 2.3 (2.38-2.30) <sup>1</sup> | 1.9               |
| No. of unique reflections*              | 50010(4033)                  | 40691             |
| Completeness (%)*                       | 97.3 (79)                    | 95.6              |
| Redundancy*                             | 7.3 (5.1)                    | 3.5               |
| $I/\sigma$ *                            | 12.3 (6.7)                   | 28.0              |
| R <sub>sym</sub> (%)*                   | 9.8 (43)                     | 4.5               |
| <b>Refinement</b>                       |                              |                   |
| No. of molecules in the asymmetric unit | 3                            | 2                 |
| No. of residues                         | 622                          | 432               |
| No. of ions                             | 5                            | 3                 |
| No. of water molecules                  | 142                          | 245               |
| R factor / R <sub>Free</sub> (%)        | 23.7 / 28.8                  | 23.0 / 29.0       |
| RMS deviations                          |                              |                   |
| Bond (Å)                                | 0.032                        | 0.029             |
| Angles (°)                              | 2.53                         | 2.24              |

<sup>1</sup>Numbers in parenthesis are values in the highest resolution shell

**Supplemental Table 2. Summary of Zn EXAFS fitting analysis for the CadC dimer.** Data fit over a k range of 1 to 13.0 Å<sup>-1</sup>. Best-fit parameters for each sample are indicated in bold.

| Sample                            | Fit #      | Ligand Environment <sup>a</sup> |                   |                   |                 | Ligand Environment <sup>a</sup> |                   |                   |                 | F, <sup>f</sup> |  |
|-----------------------------------|------------|---------------------------------|-------------------|-------------------|-----------------|---------------------------------|-------------------|-------------------|-----------------|-----------------|--|
|                                   |            | Atom <sup>b</sup>               | R(Å) <sup>c</sup> | C.N. <sup>d</sup> | σ <sup>2e</sup> | Atom <sup>b</sup>               | R(Å) <sup>c</sup> | C.N. <sup>d</sup> | σ <sup>2e</sup> |                 |  |
| Wild Type<br>2 Zn/dimer           | 1.1        | S                               | 2.30              | 1.0               | 3.06            |                                 |                   |                   |                 | 2.25            |  |
|                                   | 1.2        | S                               | 2.31              | 1.0               | 1.64            | O/N                             | 1.98              | 2.0               | 3.93            | 0.60            |  |
|                                   | 1.3        | S                               | 2.30              | 1.5               | 3.80            | O/N                             | 1.97              | 1.5               | 2.28            | 0.59            |  |
|                                   |            |                                 | C                 | 3.49              | 1.0             | 4.58                            |                   |                   |                 |                 |  |
|                                   | <b>1.4</b> | <b>S</b>                        | <b>2.30</b>       | <b>1.5</b>        | <b>3.73</b>     | <b>O/N</b>                      | <b>1.97</b>       | <b>2.0</b>        | <b>3.85</b>     | <b>0.41</b>     |  |
|                                   |            | <b>C</b>                        | <b>3.18</b>       | <b>1.0</b>        | <b>4.66</b>     | <b>C</b>                        | <b>4.00</b>       | <b>3.0</b>        | <b>3.18</b>     |                 |  |
| Wild Type<br>4 Zn/dimer           | 2.1        | S                               | 2.30              | 1.0               | 3.81            |                                 |                   |                   |                 | 1.99            |  |
|                                   | 2.2        | S                               | 2.30              | 1.5               | 4.34            | O/N                             | 1.97              | 2.0               | 4.45            | 0.44            |  |
|                                   | 2.3        | S                               | 2.30              | 1.5               | 4.33            | O/N                             | 1.97              | 2.0               | 4.4             | 0.39            |  |
|                                   |            |                                 | C                 | 3.98              | 2.0             | 4.07                            |                   |                   |                 |                 |  |
|                                   | <b>2.4</b> | <b>S</b>                        | <b>2.30</b>       | <b>1.5</b>        | <b>4.41</b>     | <b>O/N</b>                      | <b>1.97</b>       | <b>2.0</b>        | <b>4.43</b>     | <b>0.38</b>     |  |
|                                   |            | <b>C</b>                        | <b>3.00</b>       | <b>1.0</b>        | <b>5.69</b>     | <b>C</b>                        | <b>3.98</b>       | <b>1.0</b>        | <b>1.35</b>     |                 |  |
| Wild Type<br>2 Zn + 2<br>Cd/dimer | 3.1        | O/N                             | 1.97              | 3.0               | 4.65            |                                 |                   |                   |                 | 0.77            |  |
|                                   | 3.2        | O/N                             | 1.95              | 3.0               | 2.97            | O/N                             | 2.09              | 1.5               | 3.35            | 0.49            |  |
|                                   | <b>3.3</b> | <b>O/N</b>                      | <b>1.95</b>       | <b>3.0</b>        | <b>2.98</b>     | <b>O/N</b>                      | <b>2.09</b>       | <b>1.5</b>        | <b>3.41</b>     | <b>0.38</b>     |  |
|                                   |            | <b>C</b>                        | <b>3.95</b>       | <b>2.0</b>        | <b>4.2</b>      |                                 |                   |                   |                 |                 |  |
| Site 1<br>mutant<br>2 Zn/dimer    | 4.1        | O/N                             | 1.96              | 4.0               | 4.06            |                                 |                   |                   |                 | 0.69            |  |
|                                   | <b>4.2</b> | <b>O/N</b>                      | <b>1.96</b>       | <b>4.0</b>        | <b>4.02</b>     | <b>C</b>                        | <b>3.93</b>       | <b>2.5</b>        | <b>4.7</b>      | <b>0.50</b>     |  |
| Site 2<br>mutant<br>2 Zn/dimer    | 5.2        | S                               | 2.30              | 3.0               | 4.96            |                                 |                   |                   |                 | 0.70            |  |
|                                   | 5.2        | S                               | 2.31              | 2.5               | 3.70            | O/N                             | 2.04              | 1.0               | 3.24            | 0.49            |  |
|                                   | 5.3        | S                               | 2.31              | 2.0               | 2.56            | O/N                             | 1.94              | 1.0               | 3.91            | 0.42            |  |
|                                   |            |                                 | O/N               | 2.08              | 1.5             | 1.10                            |                   |                   |                 |                 |  |
|                                   | <b>5.4</b> | <b>S</b>                        | <b>2.31</b>       | <b>2.0</b>        | <b>2.55</b>     | <b>O/N</b>                      | <b>1.94</b>       | <b>1.0</b>        | <b>3.75</b>     | <b>0.38</b>     |  |
|                                   |            | <b>O/N</b>                      | <b>2.08</b>       | <b>1.5</b>        | <b>1.00</b>     | <b>C</b>                        | <b>4.04</b>       | <b>2.0</b>        | <b>4.30</b>     |                 |  |

<sup>a</sup> Independent metal-ligand scattering environment

<sup>b</sup> Scattering atoms: O (oxygen), N (nitrogen), C (carbon), S (sulfur)

<sup>c</sup> Average metal-ligand bond length for 2 independent samples

<sup>d</sup> Average metal-ligand coordination number for 2 independent samples

<sup>e</sup> Average Debye-Waller factor in Å<sup>2</sup> x 10<sup>3</sup> for 2 independent samples

<sup>f</sup> Number of degrees of freedom weighted mean square deviation between data and fit

**Supplemental Table 3. Summary of Cd EXAFS fitting analysis for the CadC dimer.** Data fit over a  $k$  range of 1 to 13.0  $\text{\AA}^{-1}$ . Best-fit parameters for each sample are indicated in bold.

| Sample                            | Fit #       | Ligand Environment <sup>a</sup> |                                |                   |                         | Ligand Environment <sup>a</sup> |                                |                   |                         | F, <sup>f</sup> |
|-----------------------------------|-------------|---------------------------------|--------------------------------|-------------------|-------------------------|---------------------------------|--------------------------------|-------------------|-------------------------|-----------------|
|                                   |             | Atom <sup>b</sup>               | R( $\text{\AA}$ ) <sup>c</sup> | C.N. <sup>d</sup> | $\sigma^2$ <sup>e</sup> | Atom <sup>b</sup>               | R( $\text{\AA}$ ) <sup>c</sup> | C.N. <sup>d</sup> | $\sigma^2$ <sup>e</sup> |                 |
| Wild Type<br>2 Cd/dimer           | 6.1         | S                               | 2.48                           | 3.5               | 4.43                    |                                 |                                |                   |                         | 1.05            |
|                                   | 6.2         | S                               | 2.50                           | 2.5               | 5.03                    | O/N                             | 2.30                           | 2.0               | 1.01                    | 0.27            |
|                                   | <b>6.3</b>  | <b>S</b>                        | <b>2.50</b>                    | <b>2.5</b>        | <b>5.34</b>             | <b>O/N</b>                      | <b>2.30</b>                    | <b>2.0</b>        | <b>1.31</b>             | <b>0.26</b>     |
|                                   |             | <b>C</b>                        | <b>3.25</b>                    | <b>1.0</b>        | <b>4.49</b>             |                                 |                                |                   |                         |                 |
| Wild Type<br>4 Cd/dimer           | 7.1         | S                               | 2.51                           | 3.0               | 4.87                    |                                 |                                |                   |                         | 0.60            |
|                                   | 7.2         | S                               | 2.52                           | 2.5               | 4.79                    | O/N                             | 2.28                           | 4.5               | 3.51                    | 0.18            |
|                                   | <b>7.3</b>  | <b>S</b>                        | <b>2.52</b>                    | <b>2.5</b>        | <b>4.79</b>             | <b>O/N</b>                      | <b>2.31</b>                    | <b>1.5</b>        | <b>4.65</b>             | <b>0.16</b>     |
|                                   |             | <b>C</b>                        | <b>3.70</b>                    | <b>1.0</b>        | <b>2.18</b>             |                                 |                                |                   |                         |                 |
| Wild Type<br>2 Zn + 2<br>Cd/dimer | 8.1         | S                               | 2.51                           | 4.0               | 4.54                    |                                 |                                |                   |                         | 0.98            |
|                                   | 8.2         | S                               | 2.51                           | 3.0               | 4.59                    | O/N                             | 2.31                           | 1.5               | 4.25                    | 0.70            |
|                                   | <b>8.3</b>  | <b>S</b>                        | <b>2.51</b>                    | <b>3.0</b>        | <b>4.58</b>             | <b>O/N</b>                      | <b>2.31</b>                    | <b>2.0</b>        | <b>2.37</b>             | <b>0.68</b>     |
|                                   |             | <b>C</b>                        | <b>3.83</b>                    | <b>2.0</b>        | <b>2.17</b>             |                                 |                                |                   |                         |                 |
| Site 1<br>2 Cd/dimer              | 9.1         | O/N                             | 2.28                           | 3.0               | 4.56                    |                                 |                                |                   |                         | 0.71            |
|                                   | 9.2         | O/N                             | 2.25                           | 3.0               | 2.60                    | O/N                             | 2.39                           | 2.0               | 3.44                    | 0.55            |
|                                   | <b>9.3</b>  | <b>O/N</b>                      | <b>2.25</b>                    | <b>3.0</b>        | <b>2.25</b>             | <b>O/N</b>                      | <b>2.39</b>                    | <b>2.0</b>        | <b>3.28</b>             | <b>0.51</b>     |
|                                   |             | <b>C</b>                        | <b>3.93</b>                    | <b>2.5</b>        | <b>4.7</b>              |                                 |                                |                   |                         |                 |
| Site 2<br>2 Zn/dimer              | 10.1        | S                               | 2.51                           | 4.0               | 4.45                    |                                 |                                |                   |                         | 0.39            |
|                                   | 10.2        | S                               | 2.52                           | 2.0               | 1.34                    | O/N                             | 2.29                           | 2.0               | 2.81                    | 0.18            |
|                                   | <b>10.3</b> | <b>S</b>                        | <b>2.52</b>                    | <b>2.0</b>        | <b>1.35</b>             | <b>O/N</b>                      | <b>2.29</b>                    | <b>2.0</b>        | <b>2.79</b>             | <b>0.17</b>     |
|                                   |             | <b>C</b>                        | <b>3.79</b>                    | <b>1.0</b>        | <b>3.53</b>             |                                 |                                |                   |                         |                 |

<sup>a</sup> Independent metal-ligand scattering environment

<sup>b</sup> Scattering atoms: O (oxygen), N (nitrogen), C (carbon), S (sulfur)

<sup>c</sup> Average metal-ligand bond length for 2 independent samples

<sup>d</sup> Average metal-ligand coordination number for 2 independent samples

<sup>e</sup> Average Debye-Waller factor in  $\text{\AA}^2 \times 10^3$  for 2 independent samples

<sup>f</sup> Number of degrees of freedom weighted mean square deviation between data and fit

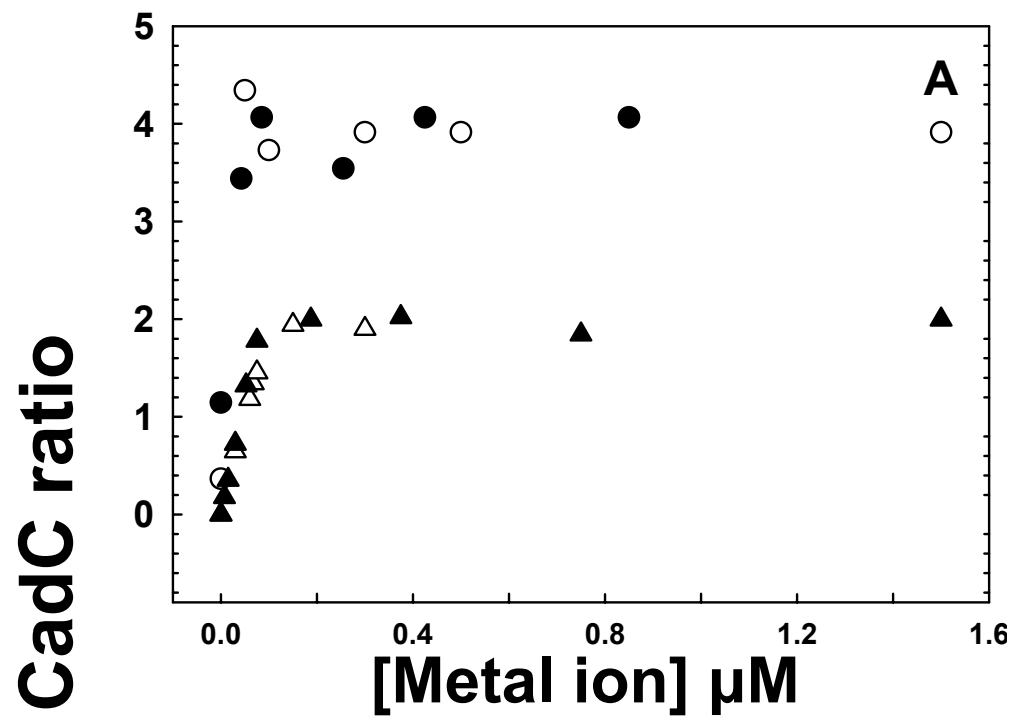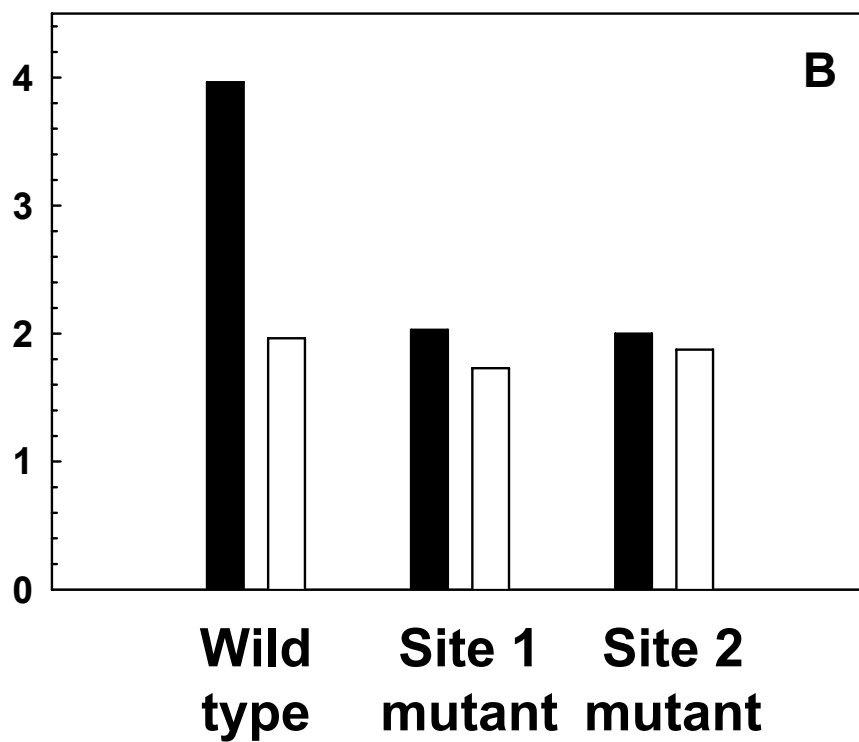

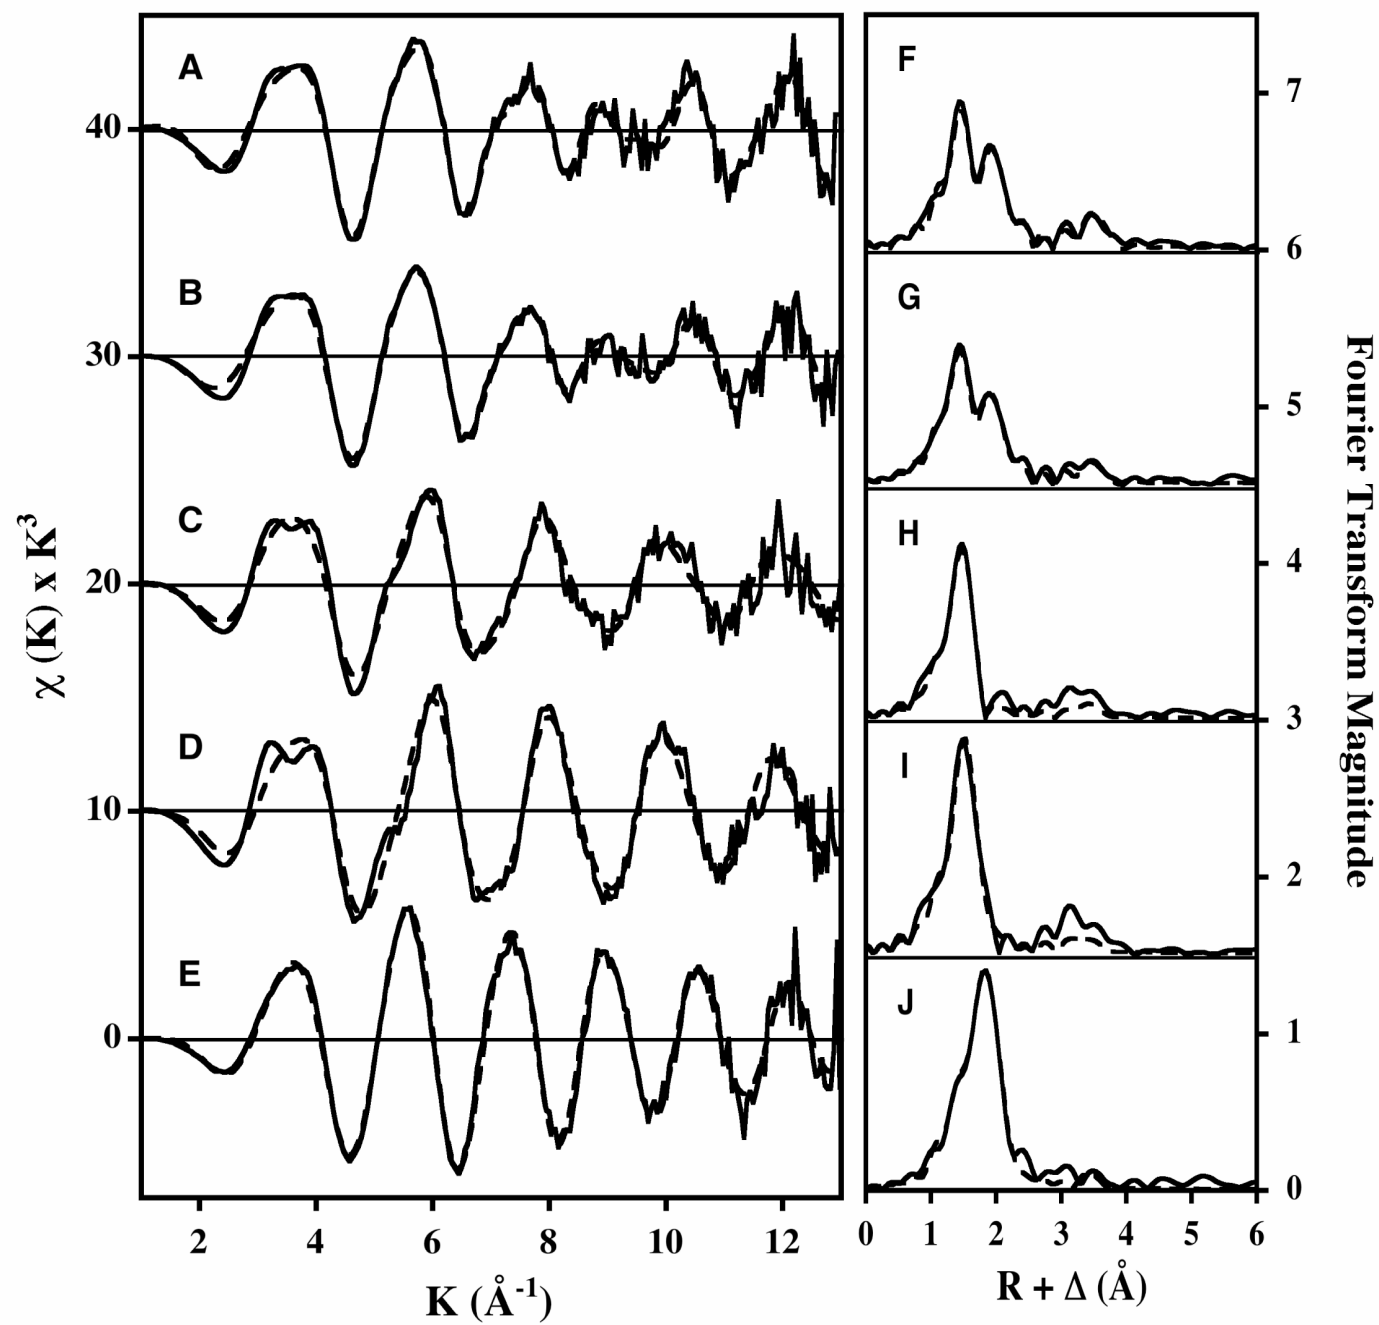

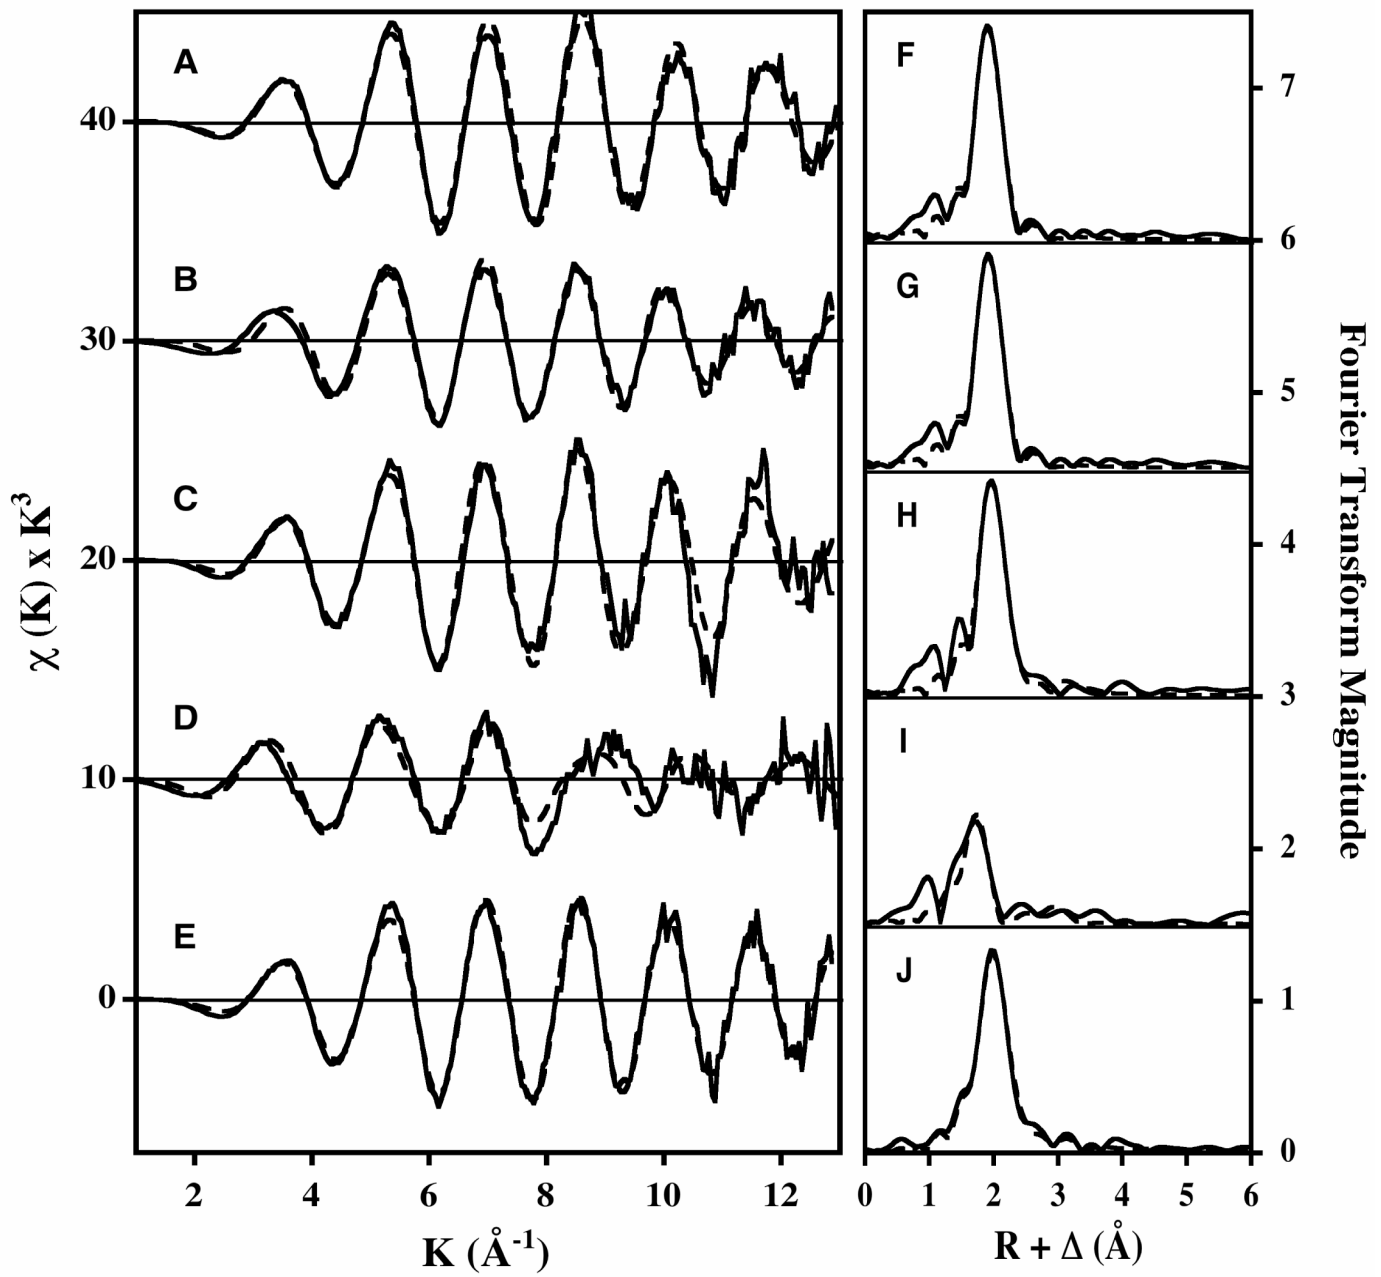

Supplement: M809179200_1.pdf [file M809179200_1.pdf]
